# Supplementary material for: SRM-MS Method Development for Hepcidin-25 Peptide
Source: Hindawi journal article supplement (doi:10.1155/2018/9653747), 2018-06-14

## Figure legends

**Supporting Information Figure 2.** The graphs show the extracted ion chromatography (EIC) of hepcidin-I (A) and hepcidin-M (B) obtained from SRM assay using 800  $\mu$ L of serum sample. Each EIC shows the peak intensity of endogenous- and SI-hepcidin (left) and also shows the peak intensity according to transitions (right).

# Supporting Information Figure 2

(A)

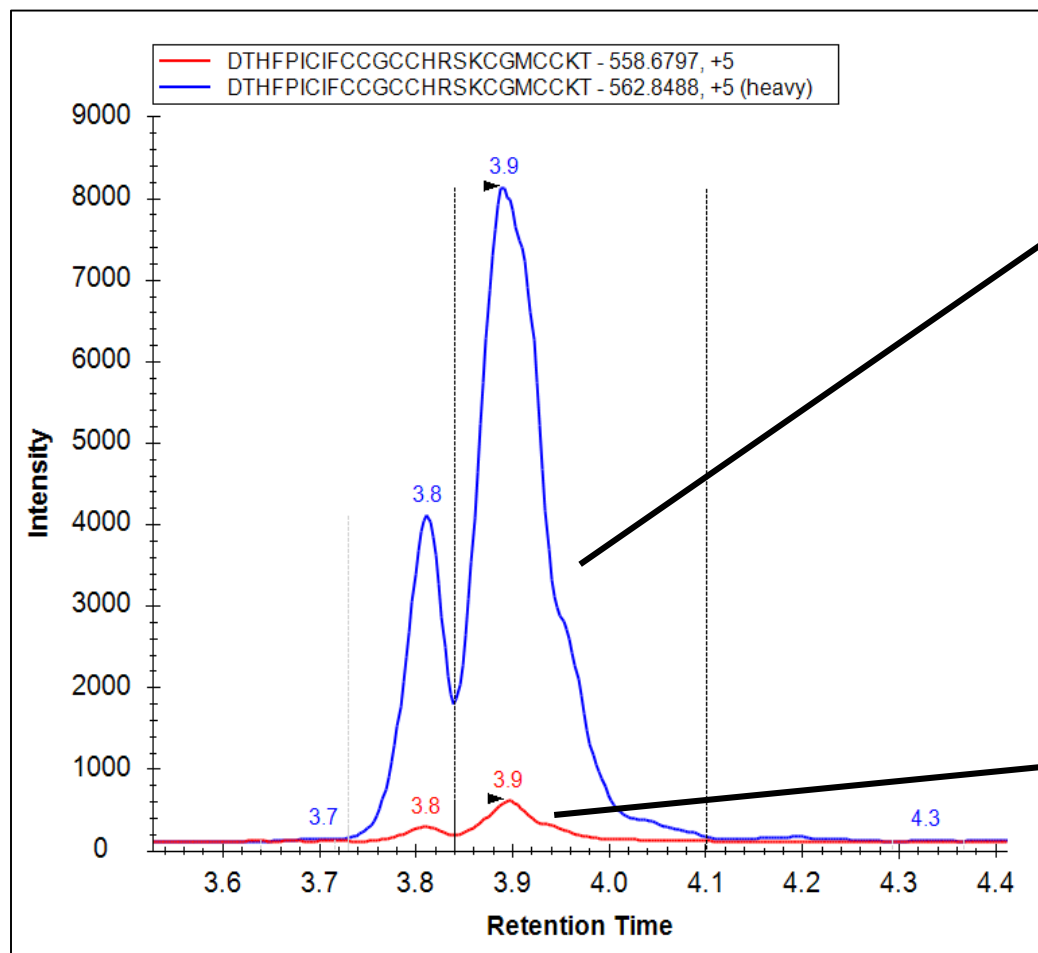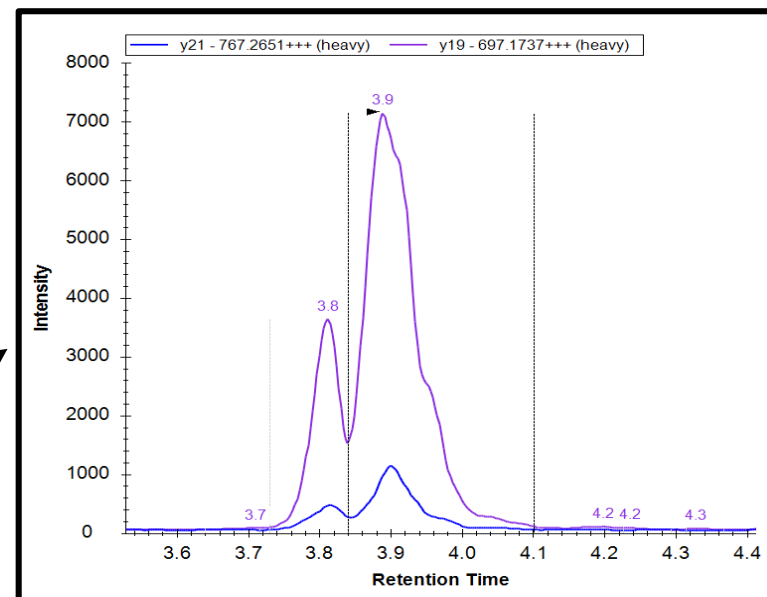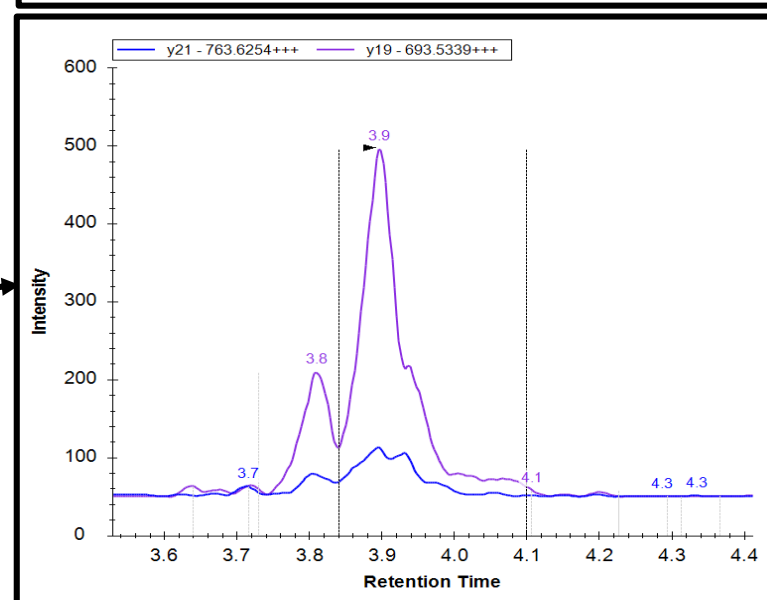

# Supporting Information Figure 2

(B)

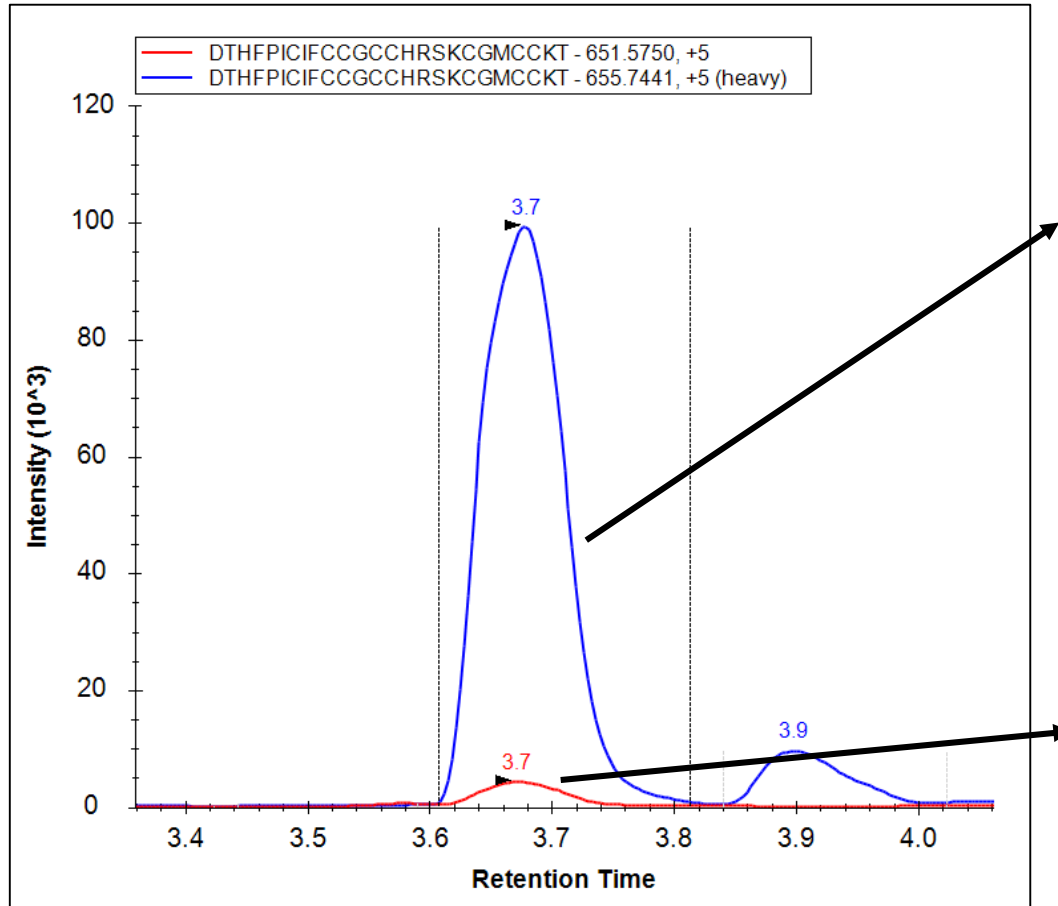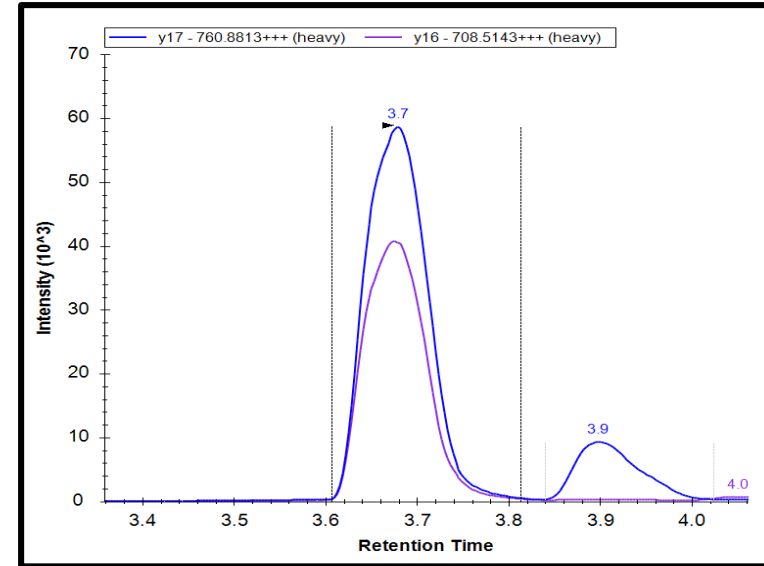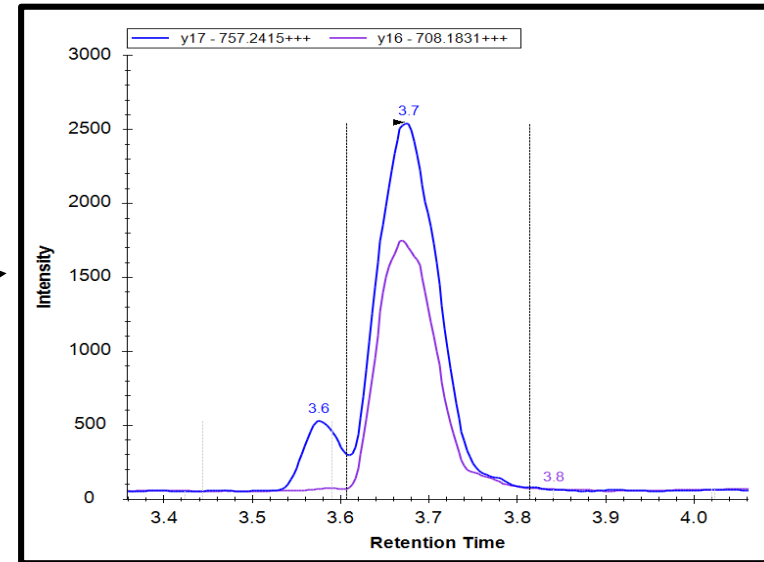

Supplement: f2 [file 9653747.f2.pdf]
